# Supplementary material
Source: PubMed Central journal article supplement (PMC7457324)
Supplement: NIHMS1622413-supplement-Chen_JAD_Supplement.pdf [file NIHMS1622413-supplement-Chen_JAD_Supplement.pdf]

**Supplement Table 1. Significantly up- and down-regulated human plasma proteins from 18 Alzheimer's patients relative to 18 controls identified in two independent experiments.**

| Exp | Accession | Description                                          | RATIO<br>(AD/Control) | AVERAGE<br>(AD) | SEM<br>(AD) | AVERAGE<br>(Control) | SEM<br>(Control) |
|-----|-----------|------------------------------------------------------|-----------------------|-----------------|-------------|----------------------|------------------|
| 1   | O75636    | Ficolin-3                                            | 0.93                  | 1.02            | 0.022       | 1.10                 | 0.037            |
| 1   | O75882    | Attractin                                            | 0.90                  | 0.98            | 0.032       | 1.09                 | 0.033            |
| 1   | O95445    | Apolipoprotein M                                     | 0.85                  | 0.94            | 0.035       | 1.11                 | 0.047            |
| 1   | P00488    | Coagulation factor XIII A chain                      | 0.89                  | 1.01            | 0.043       | 1.13                 | 0.045            |
| 1   | P00738    | Haptoglobin                                          | 1.19                  | 1.22            | 0.092       | 1.03                 | 0.063            |
| 1   | P00748    | Coagulation factor XII                               | 0.89                  | 1.00            | 0.042       | 1.13                 | 0.039            |
| 1   | P01011    | Alpha-1-antichymotrypsin                             | 1.25                  | 1.33            | 0.113       | 1.06                 | 0.040            |
| 1   | P01023    | Alpha-2-macroglobulin                                | 0.79                  | 0.87            | 0.026       | 1.11                 | 0.064            |
| 1   | P02647    | Apolipoprotein A-I                                   | 0.83                  | 0.92            | 0.044       | 1.11                 | 0.044            |
| 1   | P02655    | Apolipoprotein C-II                                  | 0.80                  | 0.93            | 0.073       | 1.16                 | 0.069            |
| 1   | P02656    | Apolipoprotein C-III                                 | 0.79                  | 1.02            | 0.097       | 1.29                 | 0.098            |
| 1   | P02741    | C-reactive protein                                   | 2.43                  | 2.43            | 0.656       | 1.00                 | 0.095            |
| 1   | P02743    | Serum amyloid P-component                            | 1.07                  | 1.08            | 0.029       | 1.01                 | 0.038            |
| 1   | P02748    | Complement component C9                              | 1.09                  | 1.21            | 0.043       | 1.11                 | 0.041            |
| 1   | P02749    | Beta-2-glycoprotein 1                                | 0.79                  | 0.90            | 0.041       | 1.13                 | 0.033            |
| 1   | P02750    | Leucine-rich alpha-2-glycoprotein                    | 1.21                  | 1.30            | 0.100       | 1.07                 | 0.067            |
| 1   | P02763    | Alpha-1-acid glycoprotein 1                          | 1.28                  | 1.35            | 0.071       | 1.05                 | 0.058            |
| 1   | P02765    | Alpha-2-HS-glycoprotein                              | 0.82                  | 0.93            | 0.037       | 1.14                 | 0.031            |
| 1   | P02787    | Serotransferrin                                      | 0.79                  | 0.84            | 0.045       | 1.07                 | 0.044            |
| 1   | P04196    | Histidine-rich glycoprotein                          | 0.88                  | 0.96            | 0.038       | 1.10                 | 0.028            |
| 1   | P05154    | Plasma serine protease inhibitor                     | 0.88                  | 0.96            | 0.038       | 1.09                 | 0.039            |
| 1   | P05452    | Tetranectin                                          | 0.85                  | 0.95            | 0.038       | 1.12                 | 0.035            |
| 1   | P06727    | Apolipoprotein A-IV                                  | 0.70                  | 0.84            | 0.049       | 1.20                 | 0.096            |
| 1   | P07360    | Complement component C8 gamma chain                  | 0.94                  | 1.01            | 0.019       | 1.08                 | 0.027            |
| 1   | P0C0L4    | Complement C4-A                                      | 1.08                  | 1.18            | 0.055       | 1.09                 | 0.030            |
| 1   | P0DJ18    | Serum amyloid A-1 protein                            | 2.90                  | 3.08            | 0.941       | 1.06                 | 0.124            |
| 1   | P0DJ19    | Serum amyloid A-2 protein                            | 2.05                  | 2.14            | 0.491       | 1.04                 | 0.042            |
| 1   | P11226    | Mannose-binding protein C                            | 1.34                  | 1.53            | 0.186       | 1.14                 | 0.110            |
| 1   | P29622    | Kallistatin                                          | 0.87                  | 0.99            | 0.048       | 1.13                 | 0.041            |
| 1   | P35542    | Serum amyloid A-4 protein                            | 1.11                  | 1.20            | 0.043       | 1.08                 | 0.050            |
| 1   | P36955    | Pigment epithelium-derived factor                    | 0.87                  | 0.93            | 0.028       | 1.07                 | 0.039            |
| 1   | P43251    | Biotinidase                                          | 0.89                  | 0.98            | 0.033       | 1.10                 | 0.033            |
| 1   | P43652    | Afamin                                               | 0.79                  | 0.85            | 0.035       | 1.08                 | 0.037            |
| 1   | P49908    | Selenoprotein P                                      | 0.87                  | 1.00            | 0.042       | 1.15                 | 0.033            |
| 1   | P51884    | Lumican                                              | 0.84                  | 0.91            | 0.048       | 1.09                 | 0.055            |
| 1   | P61626    | Lysozyme C                                           | 1.18                  | 1.30            | 0.081       | 1.10                 | 0.050            |
| 1   | P80108    | Phosphatidylinositol-glycan-specific phospholipase D | 0.89                  | 0.98            | 0.049       | 1.11                 | 0.036            |
| 1   | Q02985    | Complement factor H-related protein 3                | 1.31                  | 1.28            | 0.097       | 0.98                 | 0.076            |
| 1   | Q04756    | Hepatocyte growth factor activator                   | 0.89                  | 1.04            | 0.036       | 1.17                 | 0.051            |
| 1   | Q6UXB8    | Peptidase inhibitor 16                               | 0.87                  | 0.98            | 0.039       | 1.13                 | 0.049            |
| 1   | Q96KN2    | Beta-Ala-His dipeptidase                             | 0.84                  | 0.89            | 0.041       | 1.05                 | 0.053            |
| 1   | Q96PD5    | N-acetylmuramoyl-L-alanine amidase                   | 0.83                  | 0.92            | 0.034       | 1.10                 | 0.021            |
| 2   | O75636    | Ficolin-3                                            | 0.93                  | 0.89            | 0.026       | 0.96                 | 0.033            |
| 2   | O75882    | Attractin                                            | 0.95                  | 0.87            | 0.021       | 0.92                 | 0.025            |
| 2   | O95445    | Apolipoprotein M                                     | 0.89                  | 0.80            | 0.032       | 0.90                 | 0.035            |
| 2   | P00488    | Coagulation factor XIII A chain                      | 0.90                  | 0.89            | 0.030       | 0.98                 | 0.033            |
| 2   | P00738    | Haptoglobin                                          | 1.27                  | 1.14            | 0.093       | 0.90                 | 0.048            |
| 2   | P00748    | Coagulation factor XII                               | 0.91                  | 0.85            | 0.029       | 0.94                 | 0.023            |
| 2   | P01011    | Alpha-1-antichymotrypsin                             | 1.28                  | 1.17            | 0.084       | 0.91                 | 0.033            |
| 2   | P01023    | Alpha-2-macroglobulin                                | 0.85                  | 0.79            | 0.022       | 0.93                 | 0.057            |
| 2   | P02647    | Apolipoprotein A-I                                   | 0.93                  | 0.84            | 0.033       | 0.89                 | 0.024            |
| 2   | P02655    | Apolipoprotein C-II                                  | 0.84                  | 0.80            | 0.059       | 0.95                 | 0.053            |
| 2   | P02656    | Apolipoprotein C-III                                 | 0.80                  | 0.75            | 0.073       | 0.93                 | 0.075            |
| 2   | P02741    | C-reactive protein                                   | 2.41                  | 2.09            | 0.486       | 0.86                 | 0.081            |
| 2   | P02743    | Serum amyloid P-component                            | 1.10                  | 0.99            | 0.041       | 0.90                 | 0.031            |
| 2   | P02748    | Complement component C9                              | 1.16                  | 1.06            | 0.046       | 0.92                 | 0.031            |

|   |        |                                                      |      |      |       |      |       |
|---|--------|------------------------------------------------------|------|------|-------|------|-------|
| 2 | P02749 | Beta-2-glycoprotein 1                                | 0.87 | 0.82 | 0.036 | 0.95 | 0.030 |
| 2 | P02750 | Leucine-rich alpha-2-glycoprotein                    | 1.22 | 1.09 | 0.086 | 0.89 | 0.050 |
| 2 | P02763 | Alpha-1-acid glycoprotein 1                          | 1.32 | 1.22 | 0.063 | 0.92 | 0.044 |
| 2 | P02765 | Alpha-2-HS-glycoprotein                              | 0.86 | 0.82 | 0.029 | 0.95 | 0.038 |
| 2 | P02787 | Serotransferrin                                      | 0.87 | 0.81 | 0.034 | 0.93 | 0.031 |
| 2 | P04196 | Histidine-rich glycoprotein                          | 0.91 | 0.87 | 0.030 | 0.95 | 0.038 |
| 2 | P05154 | Plasma serine protease inhibitor                     | 0.90 | 0.85 | 0.032 | 0.94 | 0.033 |
| 2 | P05452 | Tetranectin                                          | 0.89 | 0.82 | 0.029 | 0.92 | 0.034 |
| 2 | P06727 | Apolipoprotein A-IV                                  | 0.77 | 0.75 | 0.039 | 0.96 | 0.056 |
| 2 | P07360 | Complement component C8 gamma chain                  | 0.95 | 0.88 | 0.016 | 0.92 | 0.023 |
| 2 | P0C0L4 | Complement C4-A                                      | 1.14 | 1.10 | 0.068 | 0.96 | 0.048 |
| 2 | P0DJ18 | Serum amyloid A-1 protein                            | 2.13 | 1.90 | 0.446 | 0.89 | 0.092 |
| 2 | P0DJ19 | Serum amyloid A-2 protein                            | 2.18 | 1.68 | 0.395 | 0.77 | 0.031 |
| 2 | P11226 | Mannose-binding protein C                            | 1.25 | 1.08 | 0.100 | 0.87 | 0.052 |
| 2 | P29622 | Kallistatin                                          | 0.91 | 0.84 | 0.035 | 0.93 | 0.033 |
| 2 | P35542 | Serum amyloid A-4 protein                            | 1.16 | 1.07 | 0.048 | 0.92 | 0.034 |
| 2 | P36955 | Pigment epithelium-derived factor                    | 0.93 | 0.86 | 0.025 | 0.93 | 0.031 |
| 2 | P43251 | Biotinidase                                          | 0.93 | 0.84 | 0.028 | 0.90 | 0.024 |
| 2 | P43652 | Afamin                                               | 0.82 | 0.76 | 0.029 | 0.93 | 0.040 |
| 2 | P49908 | Selenoprotein P                                      | 0.90 | 0.88 | 0.035 | 0.98 | 0.031 |
| 2 | P51884 | Lumican                                              | 0.88 | 0.81 | 0.035 | 0.93 | 0.029 |
| 2 | P61626 | Lysozyme C                                           | 1.15 | 1.10 | 0.055 | 0.96 | 0.037 |
| 2 | P80108 | Phosphatidylinositol-glycan-specific phospholipase D | 0.91 | 0.86 | 0.035 | 0.94 | 0.028 |
| 2 | Q02985 | Complement factor H-related protein 3                | 1.39 | 1.26 | 0.138 | 0.90 | 0.071 |
| 2 | Q04756 | Hepatocyte growth factor activator                   | 0.92 | 0.85 | 0.021 | 0.92 | 0.026 |
| 2 | Q6UXB8 | Peptidase inhibitor 16                               | 0.93 | 0.83 | 0.030 | 0.89 | 0.032 |
| 2 | Q96KN2 | Beta-Ala-His dipeptidase                             | 0.86 | 0.79 | 0.037 | 0.92 | 0.052 |
| 2 | Q96PD5 | N-acetylmuramoyl-L-alanine amidase                   | 0.86 | 0.82 | 0.024 | 0.95 | 0.030 |

Note: Up- and down-regulated plasma proteins in AD group (n=18) relative to the control group (n=18) with p<0.05, two-tailed Student's T test from each of the two independent studies. Exp: Experiment; SE: standard error of means.

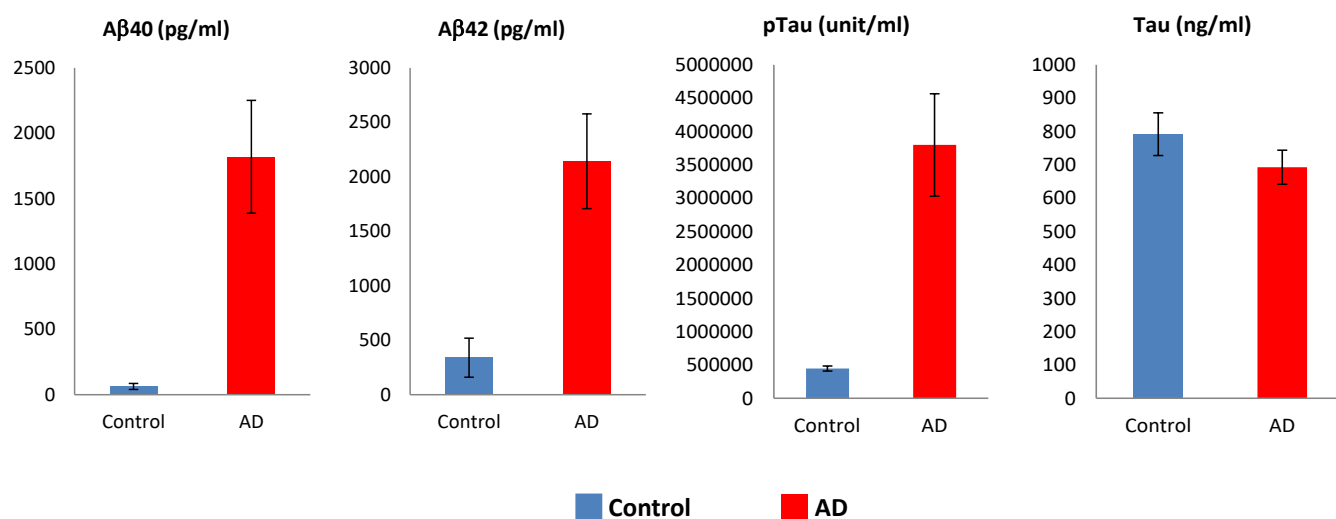

**Supplement Figure 1.** Quantification of amyloid  $\beta$  protein and Tau protein in brain lysates from AD and healthy control subjects. Levels of A $\beta$ <sub>40</sub>, A $\beta$ <sub>42</sub>, Tau and pTau 181 in brain homogenates were quantified using the Meso Scale Discovery platform. The standard error of means (error bars) are illustrated for each group. The differences between AD and control subjects are statistically significant, except for Tau ( $p < 0.05$ ).
